# Supplementary material for: A catalytic and solvent-free approach for the synthesis of diverse functionalized dipyrromethanes (DPMs) and calix[4]pyrroles (C4Ps)
Source: Royal Society of Chemistry journal article supplement (doi:10.1039/d1gc01515j), 2021-01-01
Supplement: d1gc01515j1.pdf [file d1gc01515j1.pdf]

## **Supporting Information**

### **A catalytic and solvent-free approach for the synthesis of diverse functionalized dipyrromethanes (DPMs) and calix[4]pyrroles (C4Ps)**

Ishfaq Ahmad Rather<sup>a</sup> and Rashid Ali<sup>a\*</sup>

<sup>a</sup>Organic and Supramolecular Functional Materials Research Laboratory, Department of Chemistry, Jamia Millia Islamia, Jamia Nagar, Okhla, New-Delhi-110025, India.

Phone: +91-7011867613; E-mail: [rali1@jmi.ac.in](mailto:rali1@jmi.ac.in)

#### **Table of contents**

|                                                                                                          |        |
|----------------------------------------------------------------------------------------------------------|--------|
| Materials and methods.....                                                                               | S2     |
| <b>Fig. S1.</b> Bar graph depicting % yields of compounds <b>3</b> and <b>4</b> using diverse melts..... | S2     |
| <b>Fig. S2.</b> TGA, DTG, and DTA spectra of compounds <b>3</b> and <b>4</b> .....                       | S3     |
| <b>Table S1.</b> Recyclability test of DMU:L-(+)-TA (7:3) melt .....                                     | S3     |
| <b>Table S2.</b> pH studies of diverse low melting mixtures.....                                         | S3     |
| <b>Fig. S3.</b> DMU:L-(+)-TA mediated mechanism for the synthesis of DPMs and C4Ps....                   | S4     |
| <b>Fig. S4-S32.</b> Copies of spectra for known and unknown compounds.....                               | S4-S19 |

**Materials and methods:** All commercially available reagents were used without further purification and purchased from Sigma Aldrich, Alfa Aesar, TCI, GLR, and Spectrochem. Pyrrole was used after distillation and acetone used was of HPLC grade. Analytical thin layer chromatography (TLC) was performed on aluminium plates coated with silica gel by using a suitable mixture of EtOAc and petroleum ether for development. Column chromatography was performed by using silica gel (100-200 mesh) with an appropriate mixture of EtOAc and petroleum ether. <sup>1</sup>H-NMR spectra (400 MHz and 500 MHz) and <sup>13</sup>C-NMR spectra were recorded on a Bruker spectrometer in CDCl<sub>3</sub> and DMSO. The “\*” wherever present denotes solvent residual peak. The high-resolution mass spectrometric measurements were carried out by using electrospray ionization (ESI, Q-ToF) spectrometer. TGA analysis was carried out on a Bruker spectrometer. pH studies of diverse deep eutectic solvents (DESS) have been carried out on digital pH meter (Decibel DB-1101).

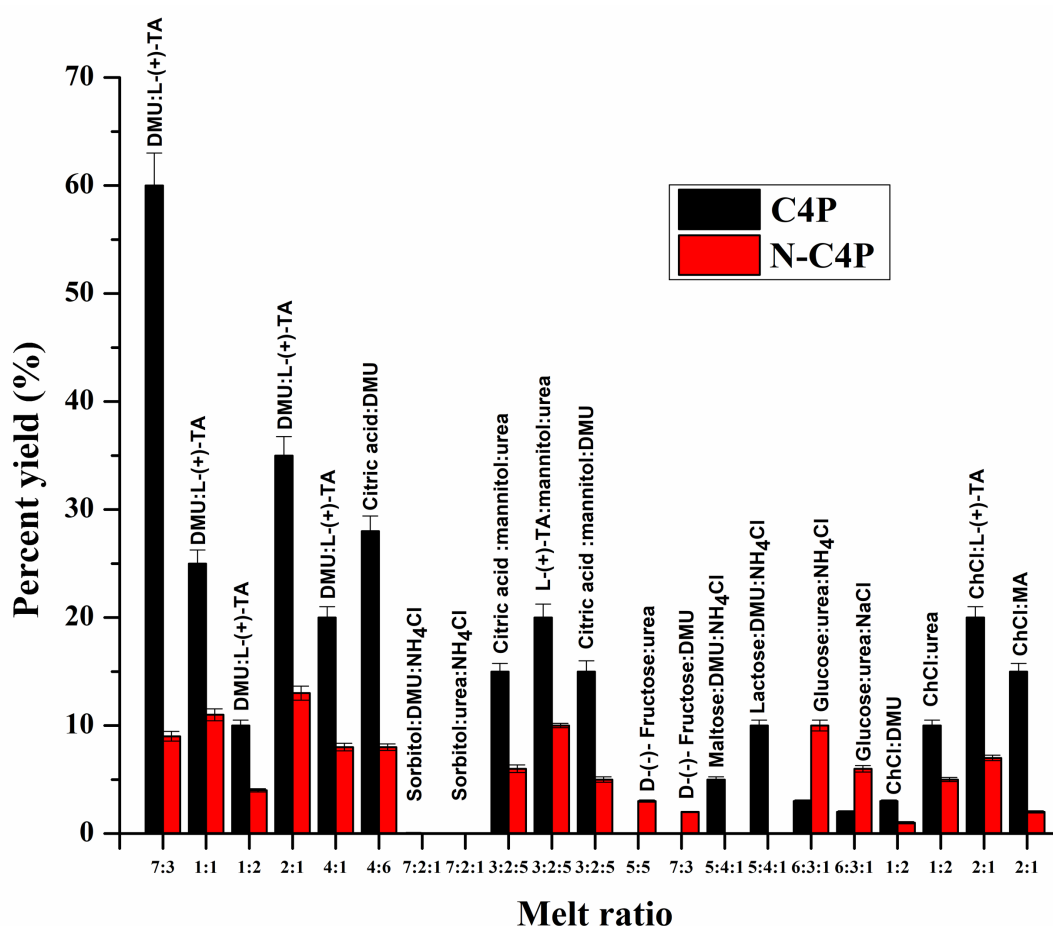

**Fig. S1.** Bar graph depicting % yields of compounds 3 and 4 using diverse melts.

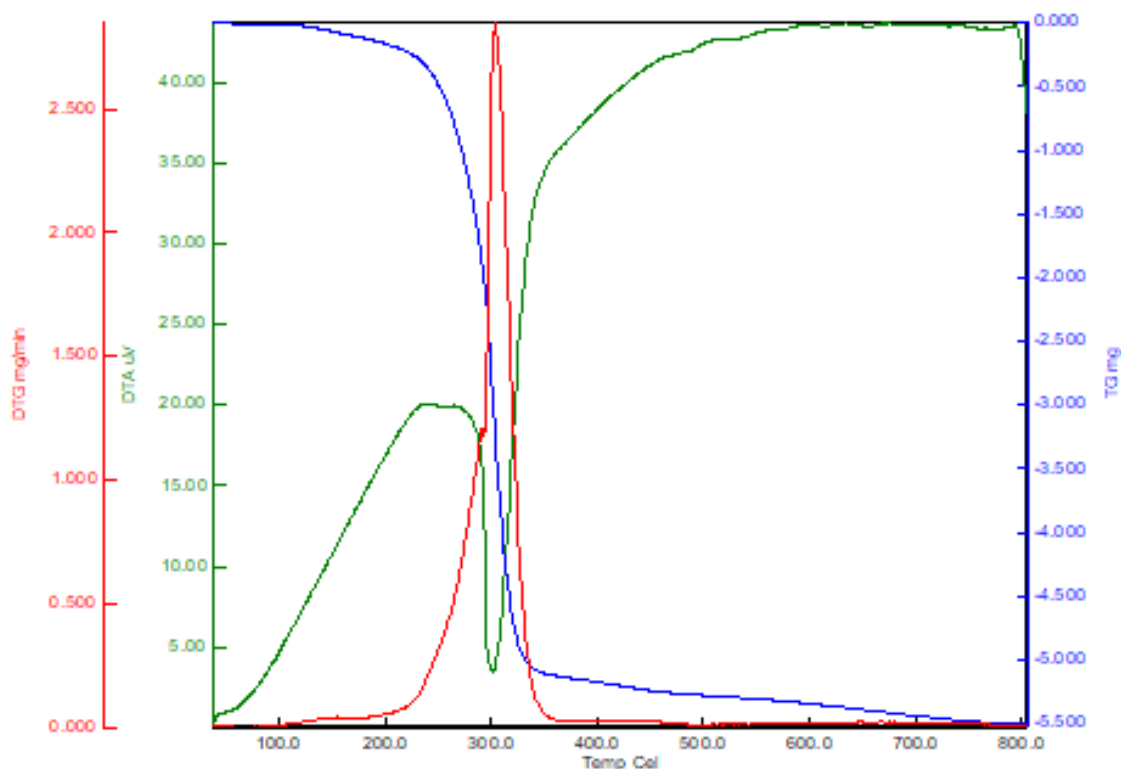

**Fig. S2.** TGA, DTG, and DTA spectra of compounds **3** and **4**.

**Table S1.** Recyclability test of DMU:L-(+)-TA (7:3) melt in the condensation reaction of pyrrole with acetone.

| Entry | Cycle               | Time (h) | 3 (% Yield) | 4 (% Yield) |
|-------|---------------------|----------|-------------|-------------|
| 1     | 1 <sup>st</sup> run | 4.5      | 60          | 9           |
| 2     | 2 <sup>nd</sup> run | 4.5      | 55          | 7           |
| 3     | 3 <sup>rd</sup> run | 4.5      | 44          | 5           |

**Table S2.** pH studies of diverse low melting mixtures.

| Melt                | pH   | Melt                                     | pH   |
|---------------------|------|------------------------------------------|------|
| DMU:L-(+)-TA (7:3)  | 3.34 | DMU:L-(+)- TA (4:1)                      | 3.5  |
| DMU:L-(+)- TA (1:1) | 3.26 | Citric acid:DMU (4:6)                    | 3.42 |
| DMU:L-(+)- TA (1:2) | 3.20 | Sorbitol:DMU:NH <sub>4</sub> Cl (7:2:1)  | 5.72 |
| DMU:L-(+)- TA (2:1) | 3.39 | Sorbitol:Urea:NH <sub>4</sub> Cl (7:2:1) | 5.75 |

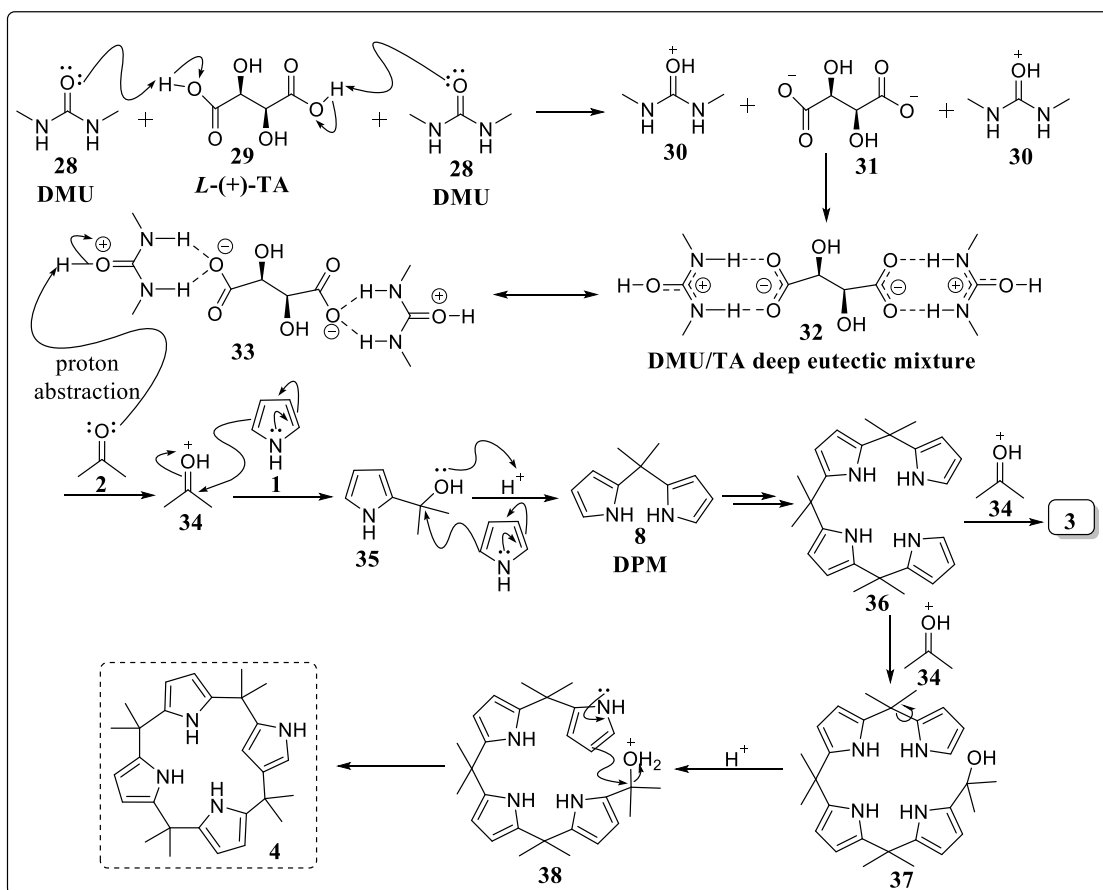

**Fig. S3.** DMU:L-(+)-TA mediated mechanism for the synthesis of DPMS and C4Ps.

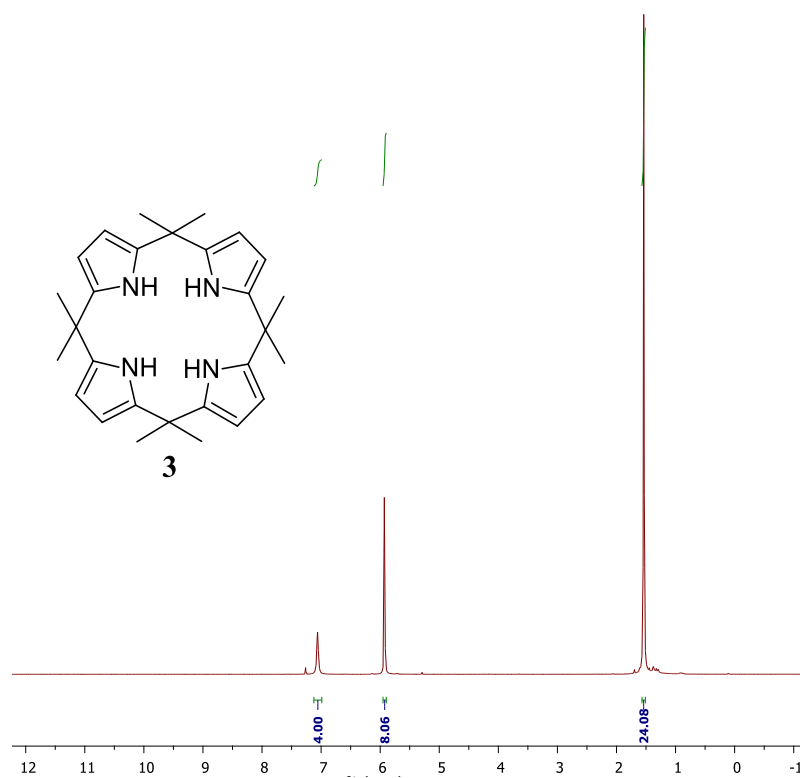

**Fig. S4.** <sup>1</sup>H-NMR spectrum of compound 3 recorded in CDCl<sub>3</sub>.

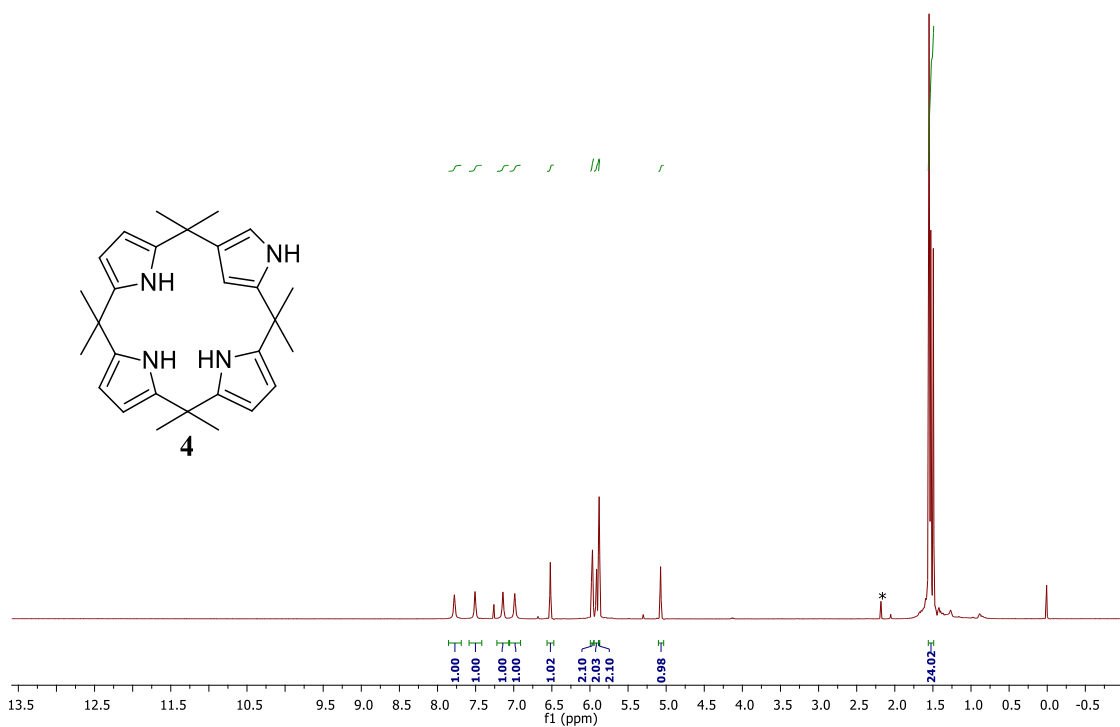

**Fig. S5.** <sup>1</sup>H-NMR spectrum of compound **4** recorded in CDCl<sub>3</sub>. (\*Represents a peak due to residual solvent acetone)

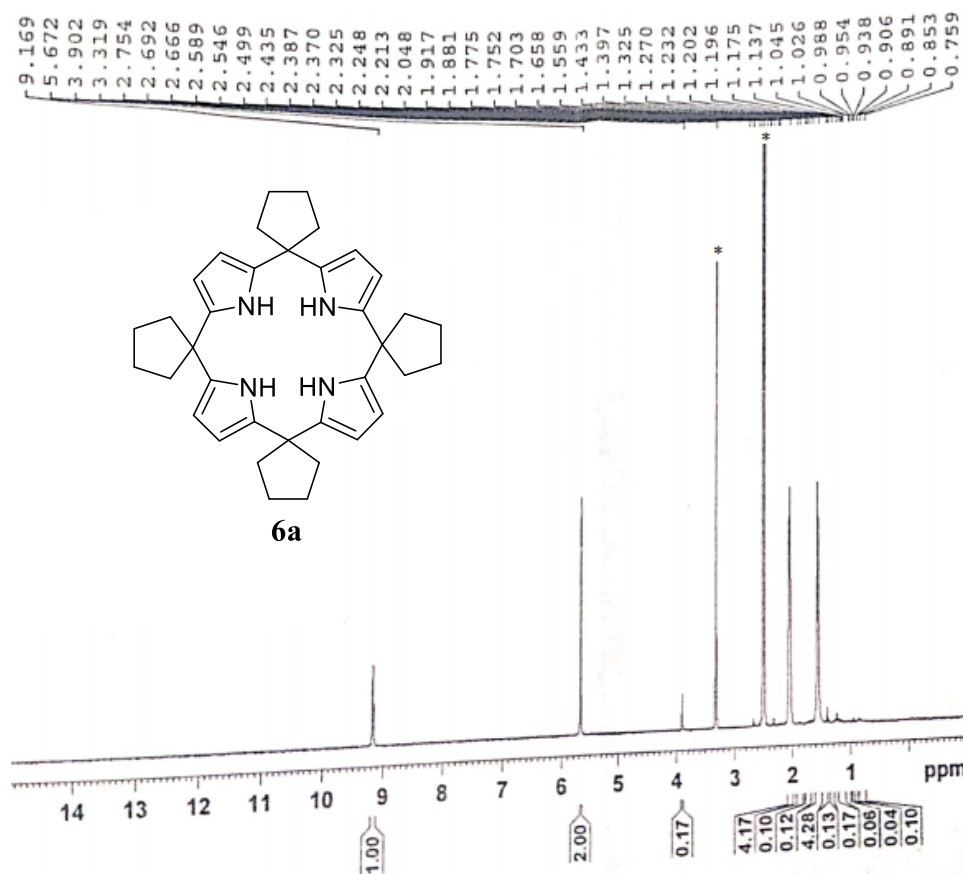

**Fig. S6.** <sup>1</sup>H-NMR spectrum of compound **6a** recorded in d<sub>6</sub>-DMSO. (\*Represents peaks due to residual solvents dimethylsulfoxide and water)

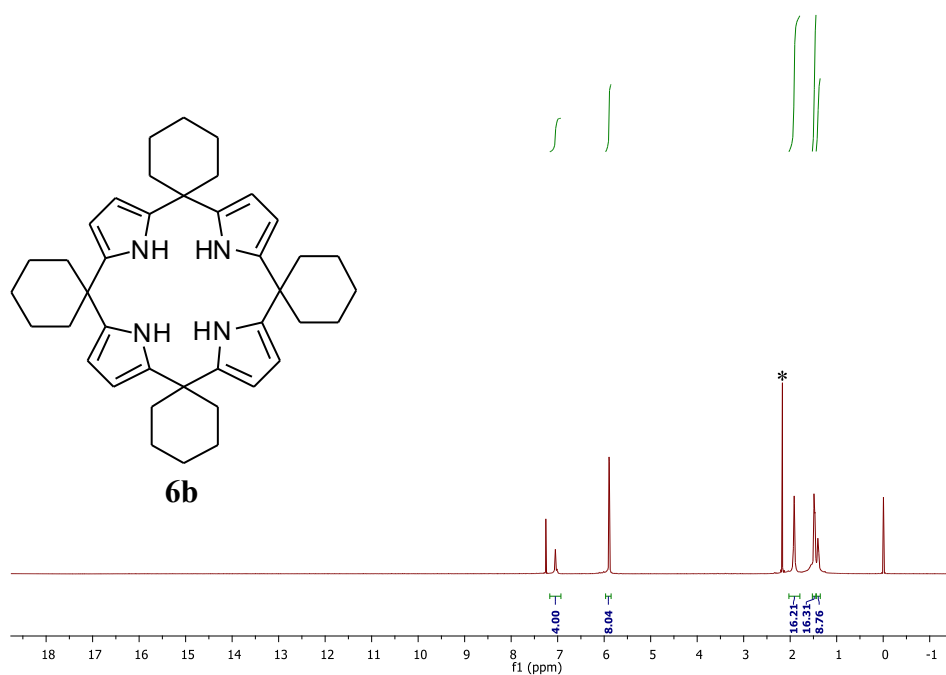

**Fig. S7.**  $^1\text{H-NMR}$  spectrum of compound **6b** recorded in  $\text{CDCl}_3$ . (\*Represents a peak due to residual solvent acetone)

060121\_69

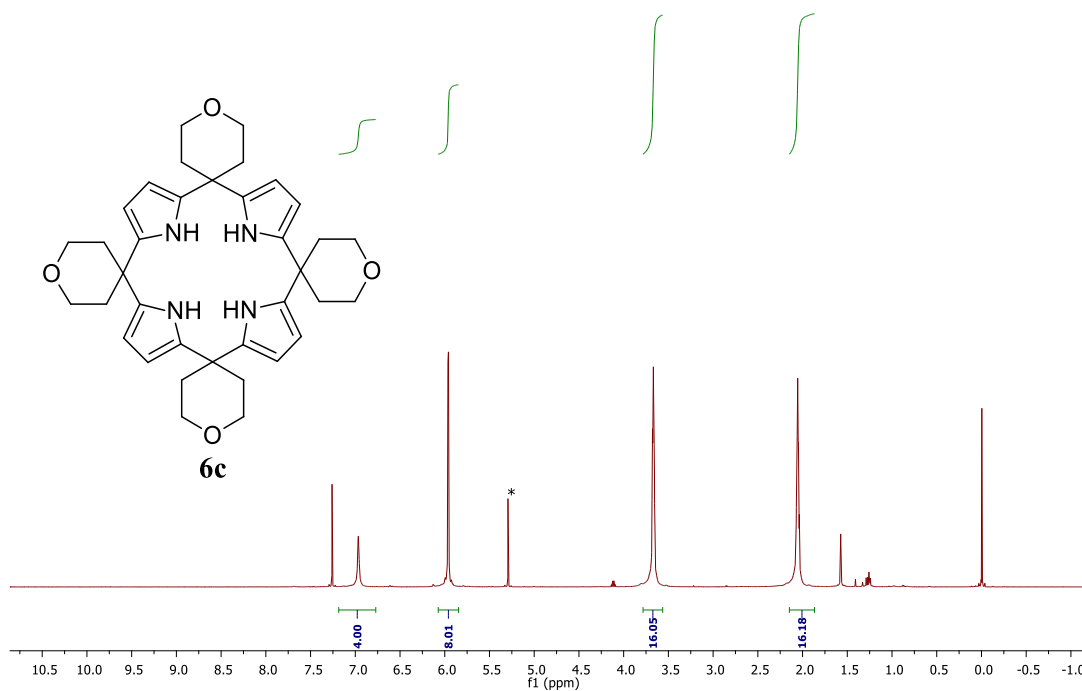

**Fig. S8.**  $^1\text{H-NMR}$  spectrum of compound **6c** recorded in  $\text{CDCl}_3$ . (\*Represents a peak due to residual solvent dichloromethane)

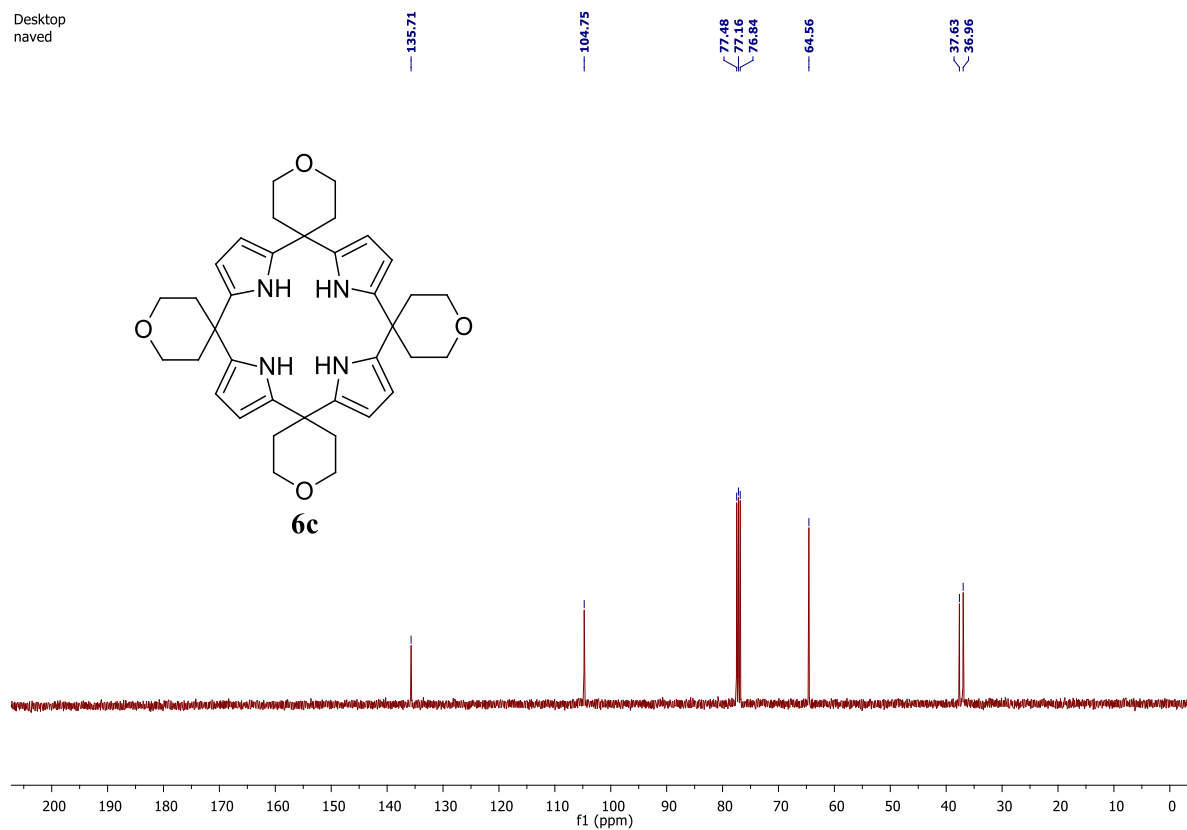

**Fig. S9.** <sup>13</sup>C-NMR spectrum of compound **6c** recorded in CDCl<sub>3</sub>.

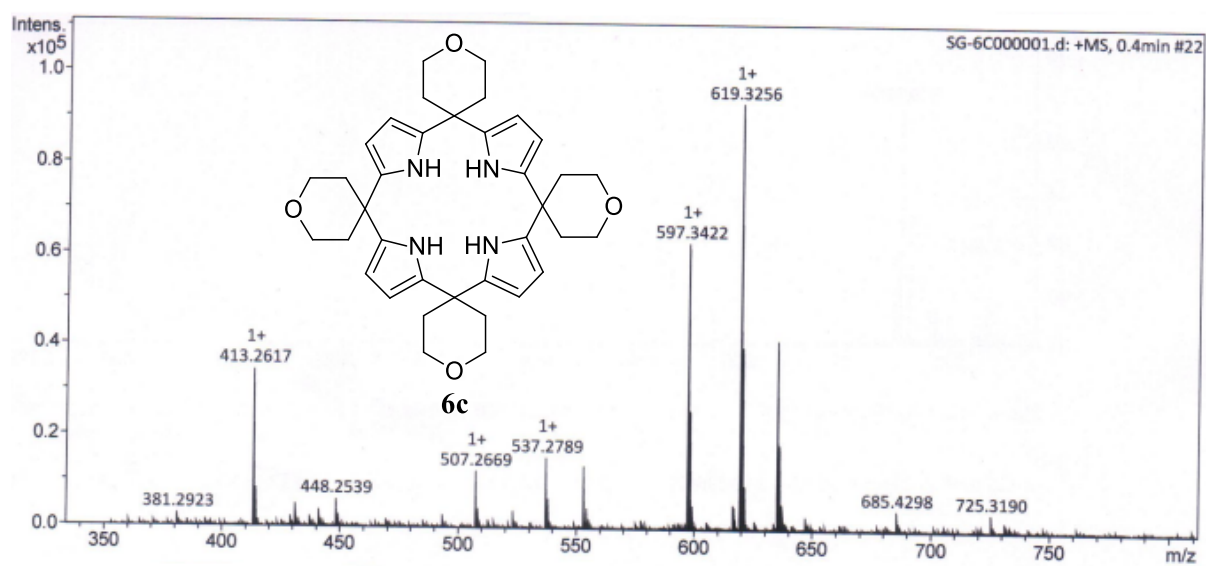

**Fig. S10.** HRMS spectrum of compound **6c** ( $m/z$  calculated for C<sub>28</sub>H<sub>36</sub>N<sub>4</sub> [M+Na]<sup>+</sup> = 619.3255)

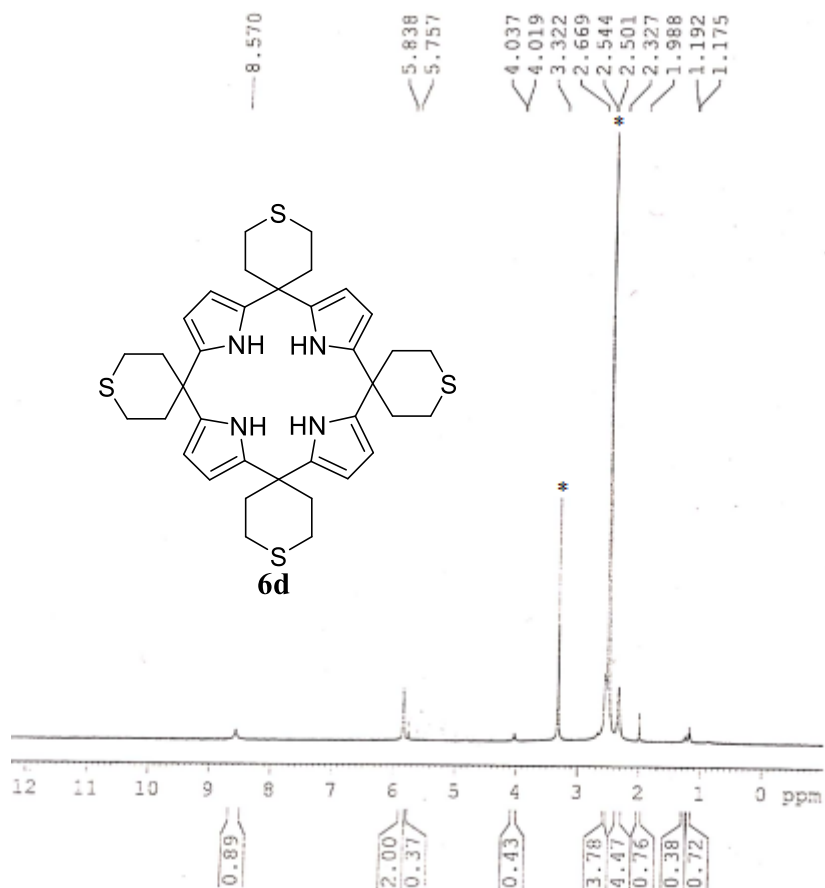

**Fig. S11.** <sup>1</sup>H-NMR spectrum of compound **6d** recorded in d<sub>6</sub>-DMSO. (\*Represents peaks due to residual solvents dimethylsulfoxide and water)

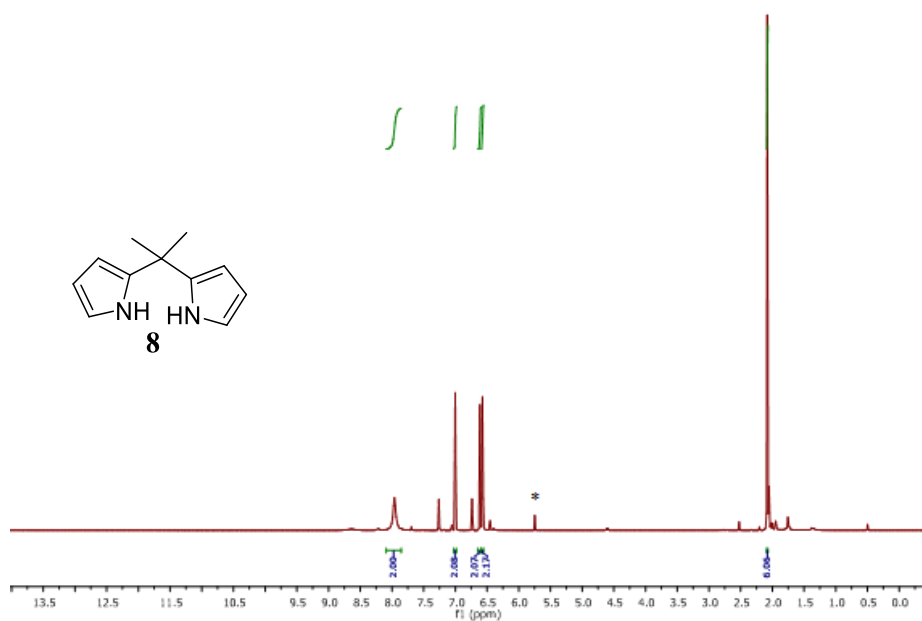

**Fig. S12.** <sup>1</sup>H-NMR spectrum of compound **8** recorded in CDCl<sub>3</sub>. (\*Represents a peak due to residual solvent dichloromethane)



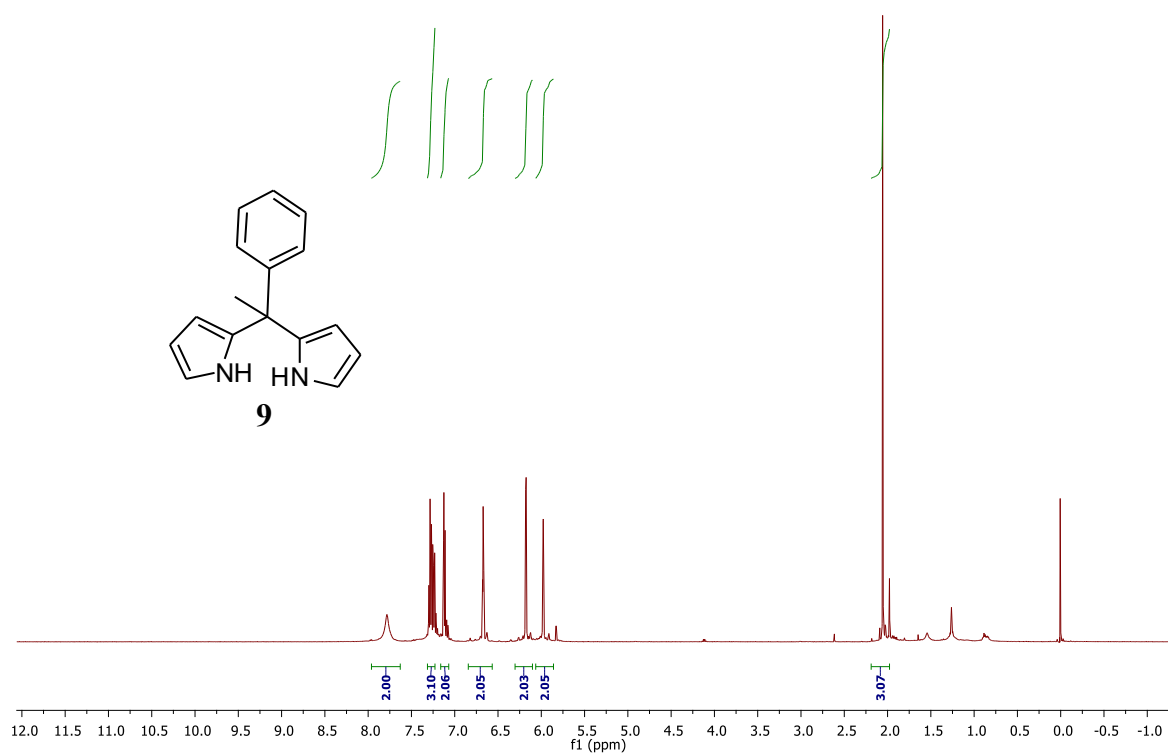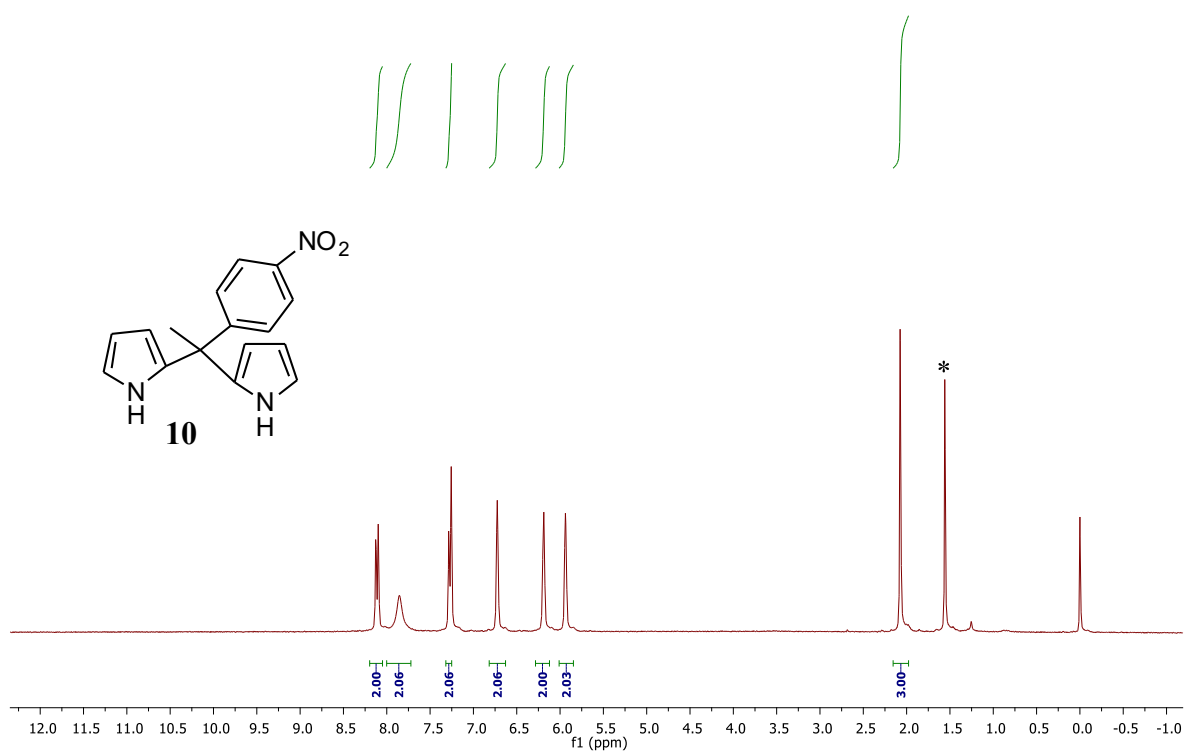

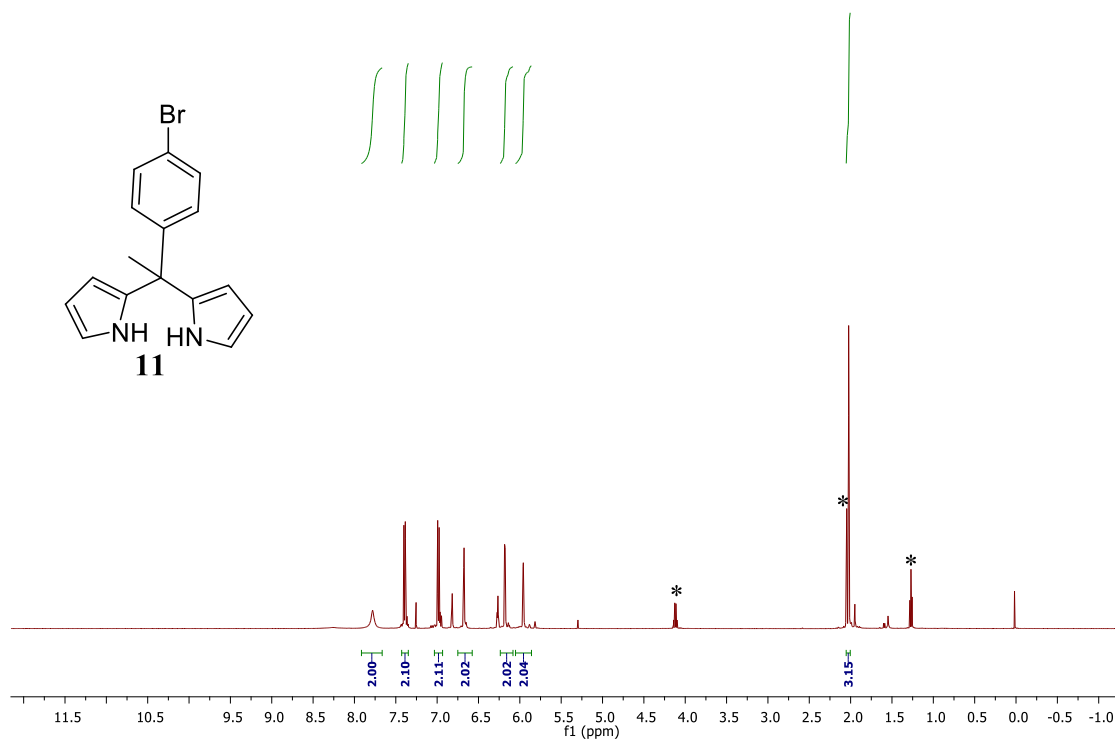

**Fig. S15.** <sup>1</sup>H-NMR spectrum of compound **11** recorded in CDCl<sub>3</sub>. (\*Represents peaks due to residual solvent ethyl acetate)

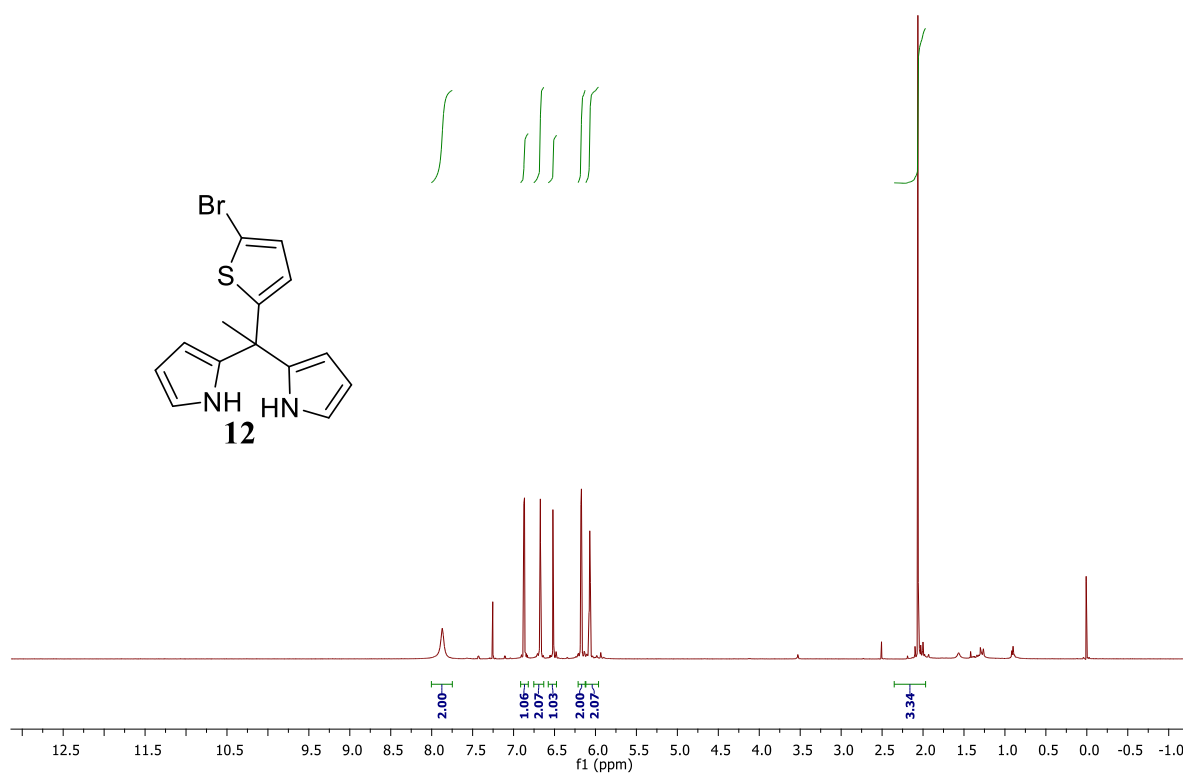

**Fig. S16.** <sup>1</sup>H-NMR spectrum of compound **12** recorded in CDCl<sub>3</sub>.

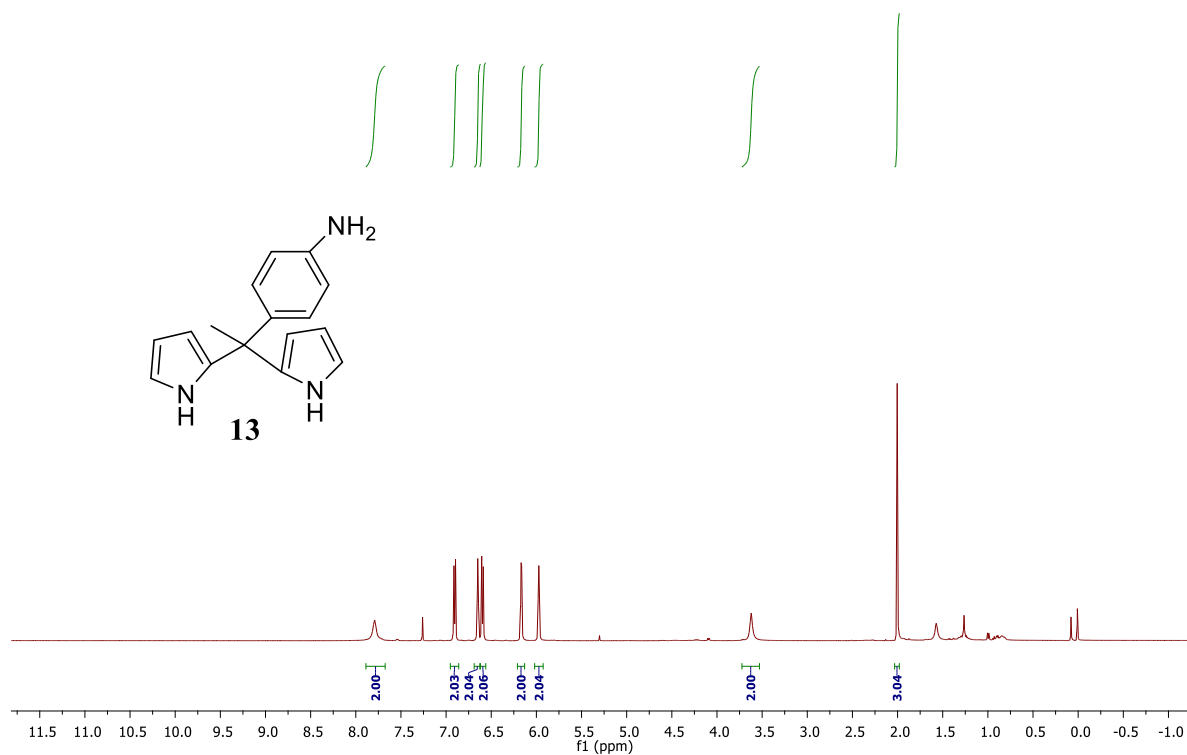

**Fig. S17.** <sup>1</sup>H-NMR spectrum of compound **13** recorded in CDCl<sub>3</sub>.

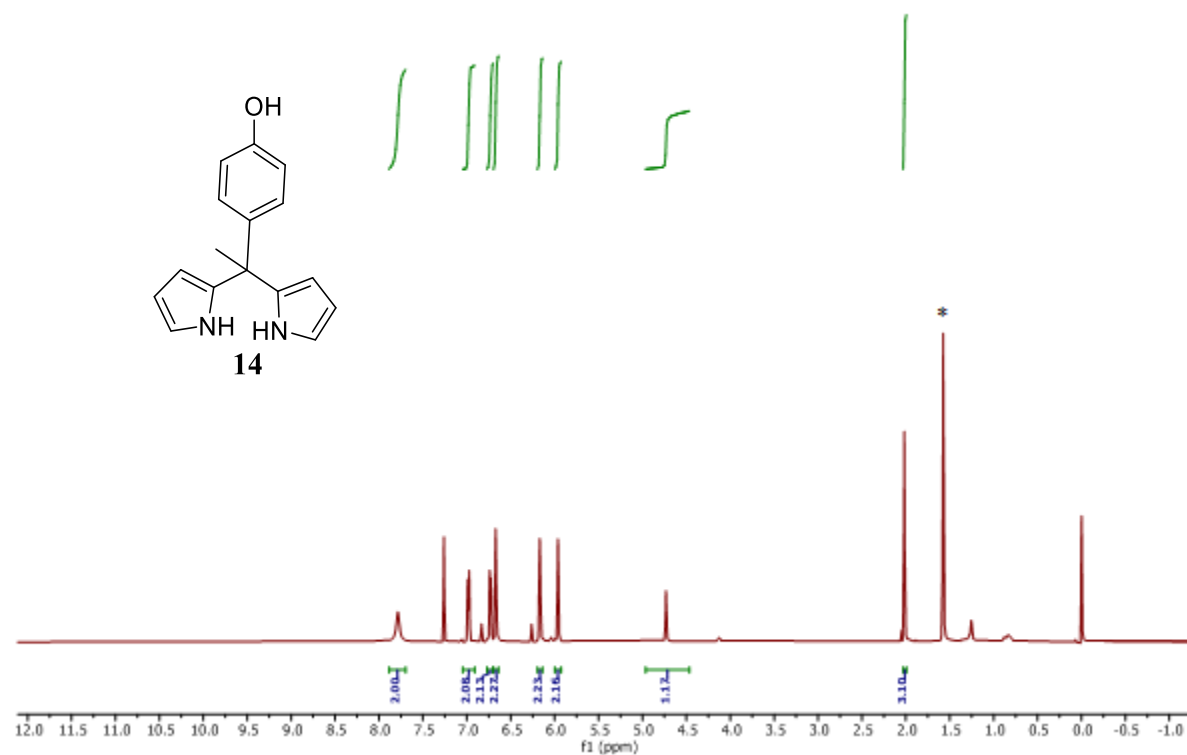

**Fig. S18.** <sup>1</sup>H-NMR spectrum of compound **14** recorded in CDCl<sub>3</sub>. (\*Represents a peak due to residual solvent water)

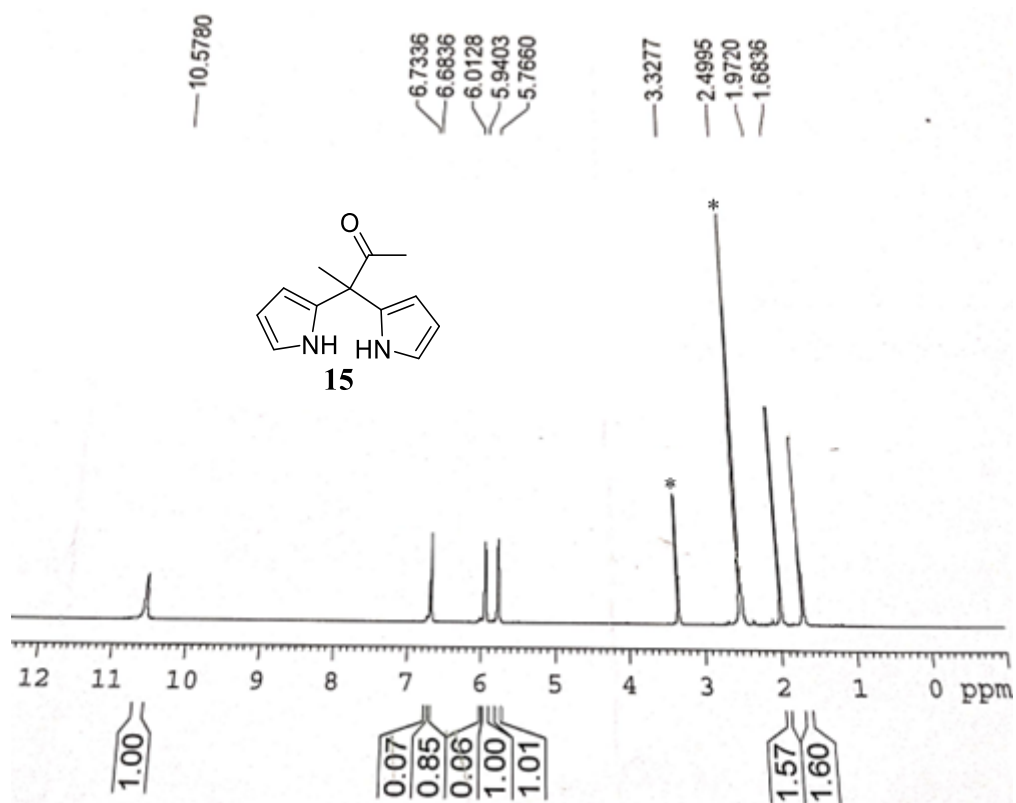

**Fig. S19.** <sup>1</sup>H-NMR spectrum of compound **15** recorded in d<sub>6</sub>-DMSO. (\*Represents peaks due to residual solvent dimethylsulfoxide and water)

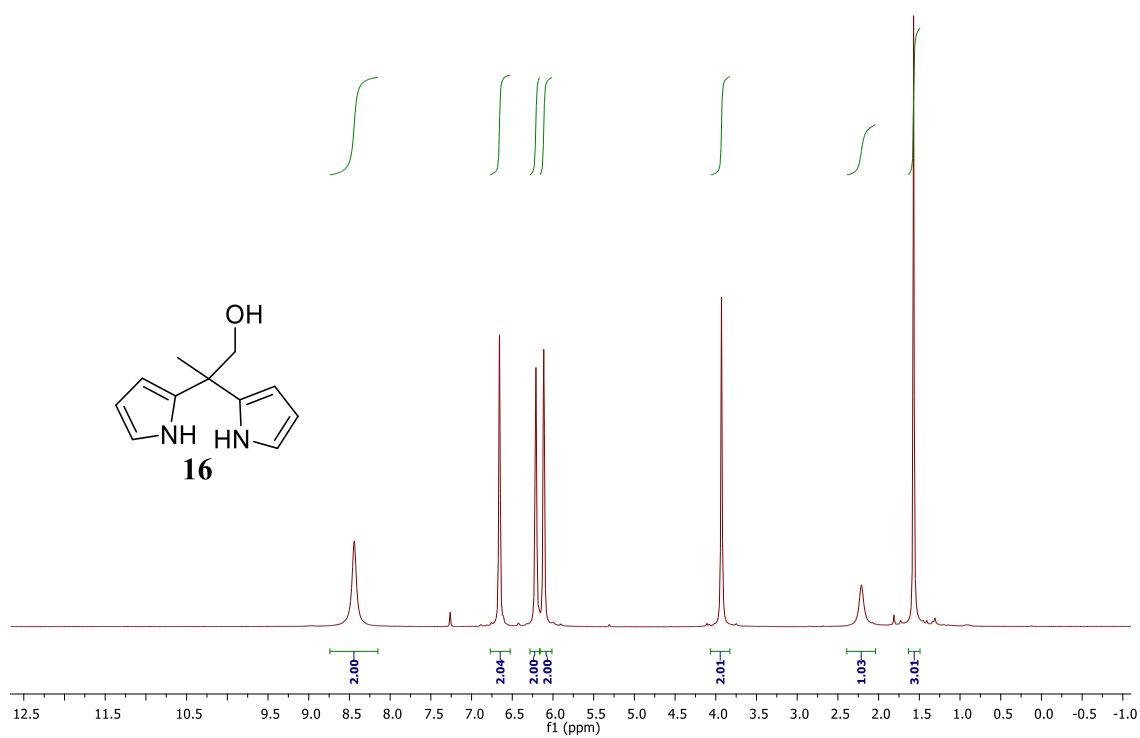

**Fig. S20.** <sup>1</sup>H-NMR spectrum of compound **16** recorded in CDCl<sub>3</sub>.

SRK-RA-48-13C  
SRK-RA-48-13C

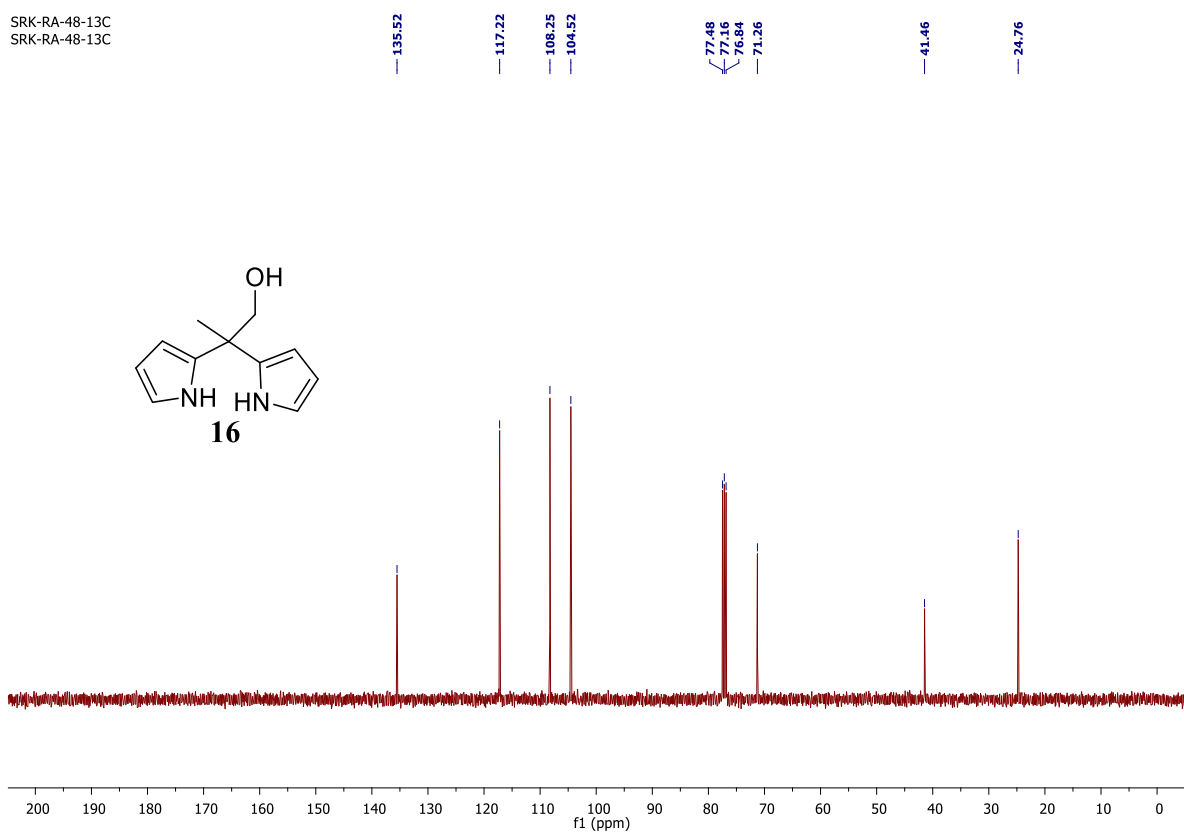

Fig. S21. <sup>13</sup>C-NMR spectrum of compound 16 recorded in CDCl<sub>3</sub>.

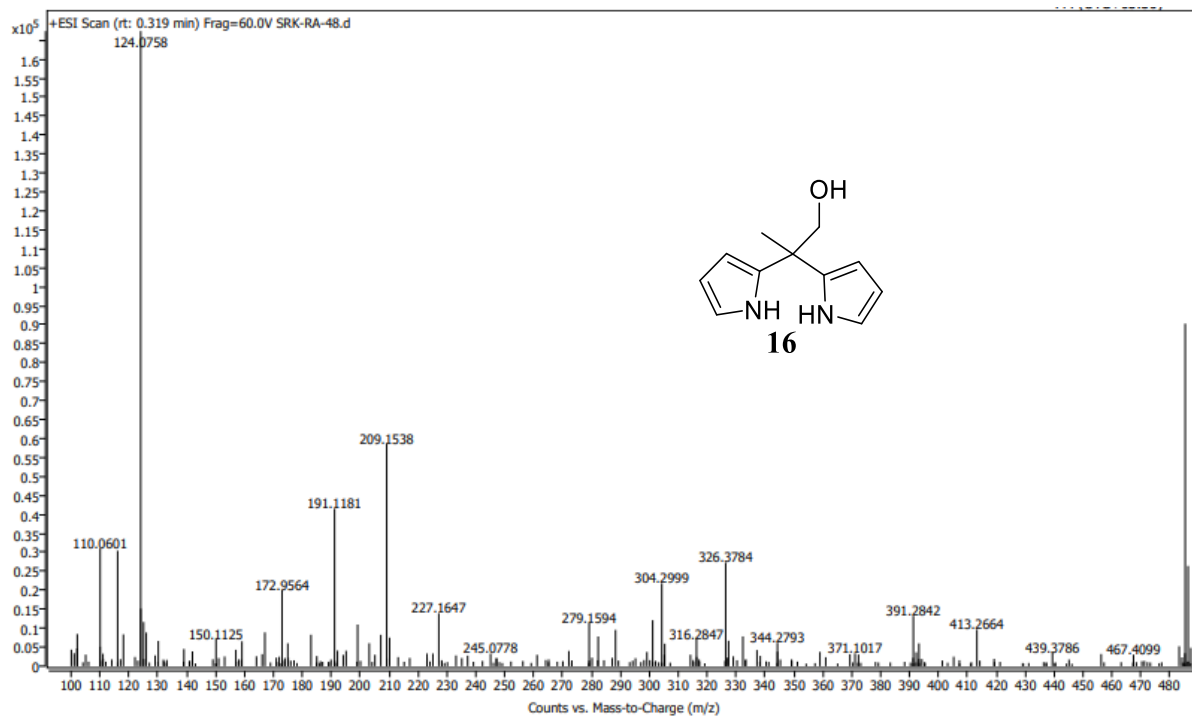

Fig. S22. HRMS spectrum of compound 16 ( $m/z$  calculated for C<sub>11</sub>H<sub>14</sub>N<sub>2</sub>O [M+H]<sup>+</sup> = 191.1179)

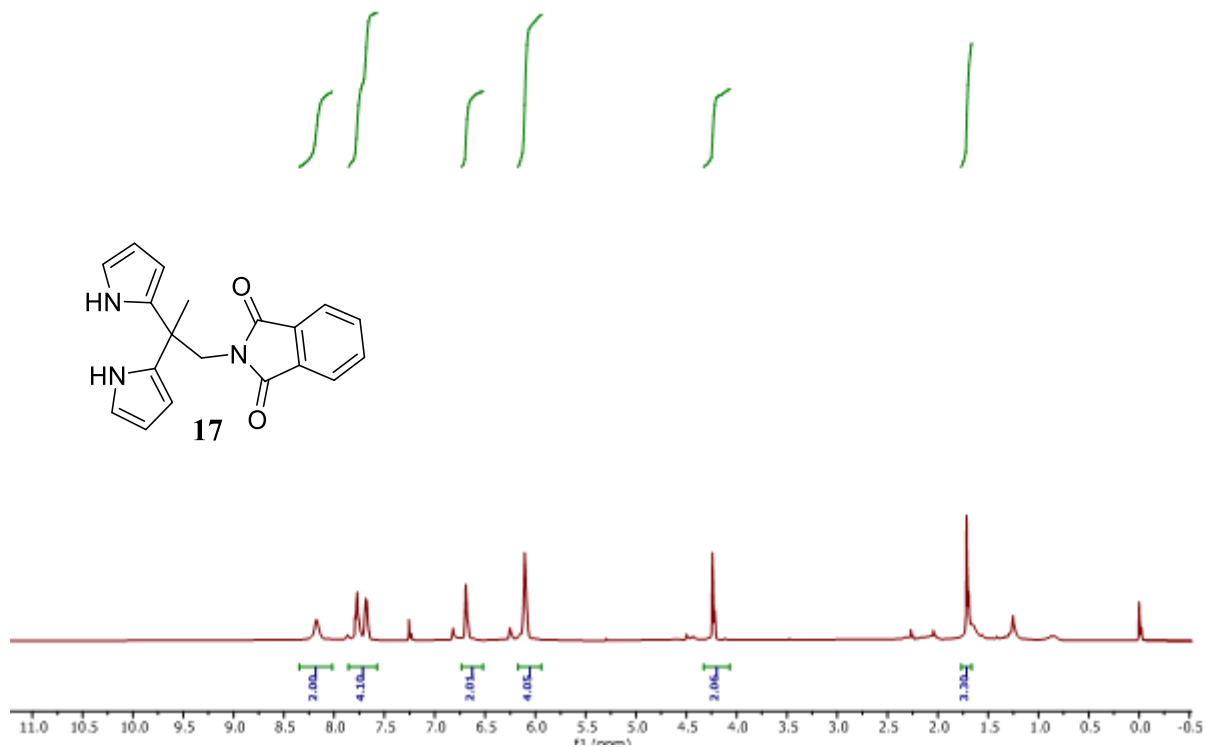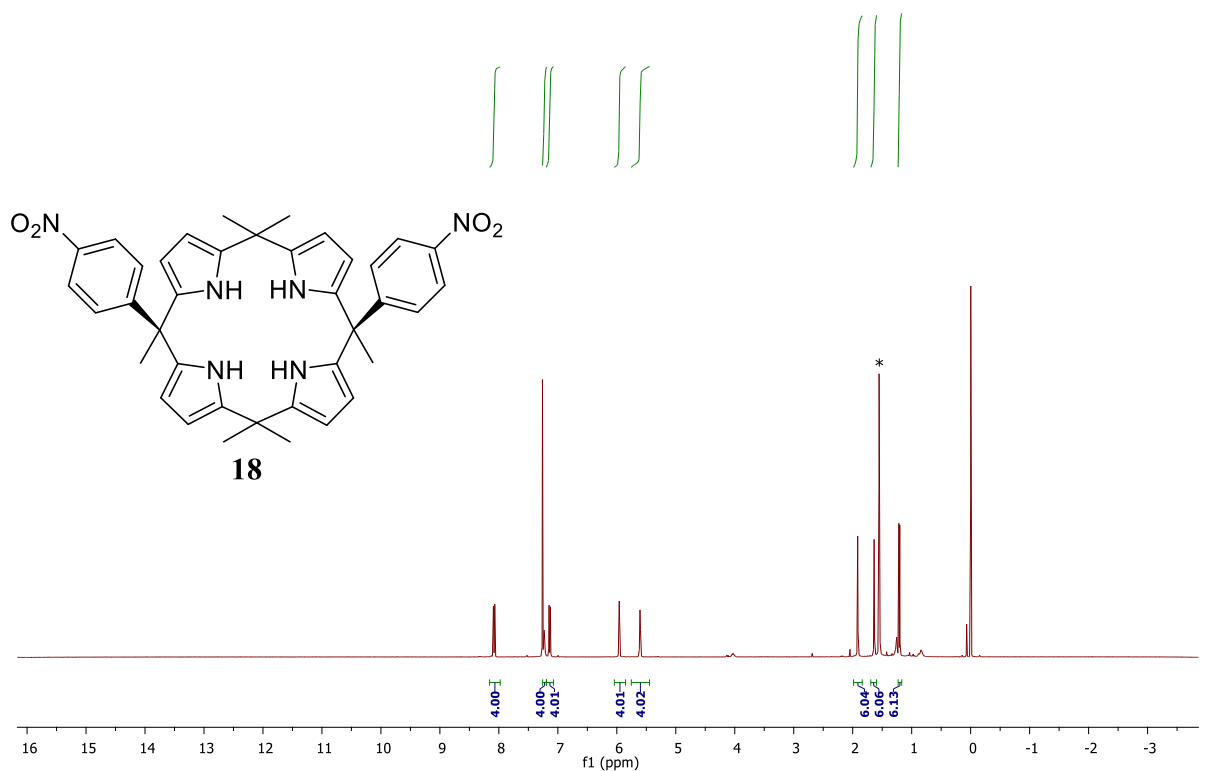

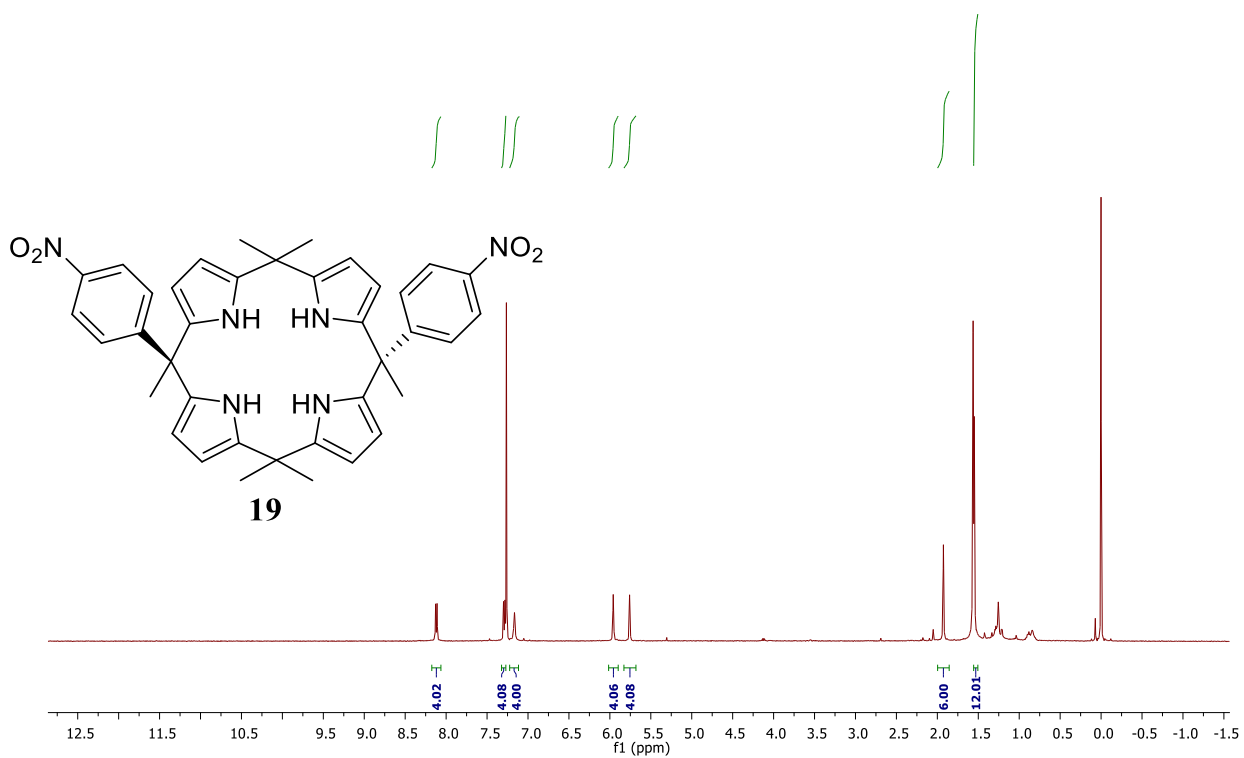

**Fig. S25.**  $^1\text{H-NMR}$  spectrum of compound **19** recorded in  $\text{CDCl}_3$ .

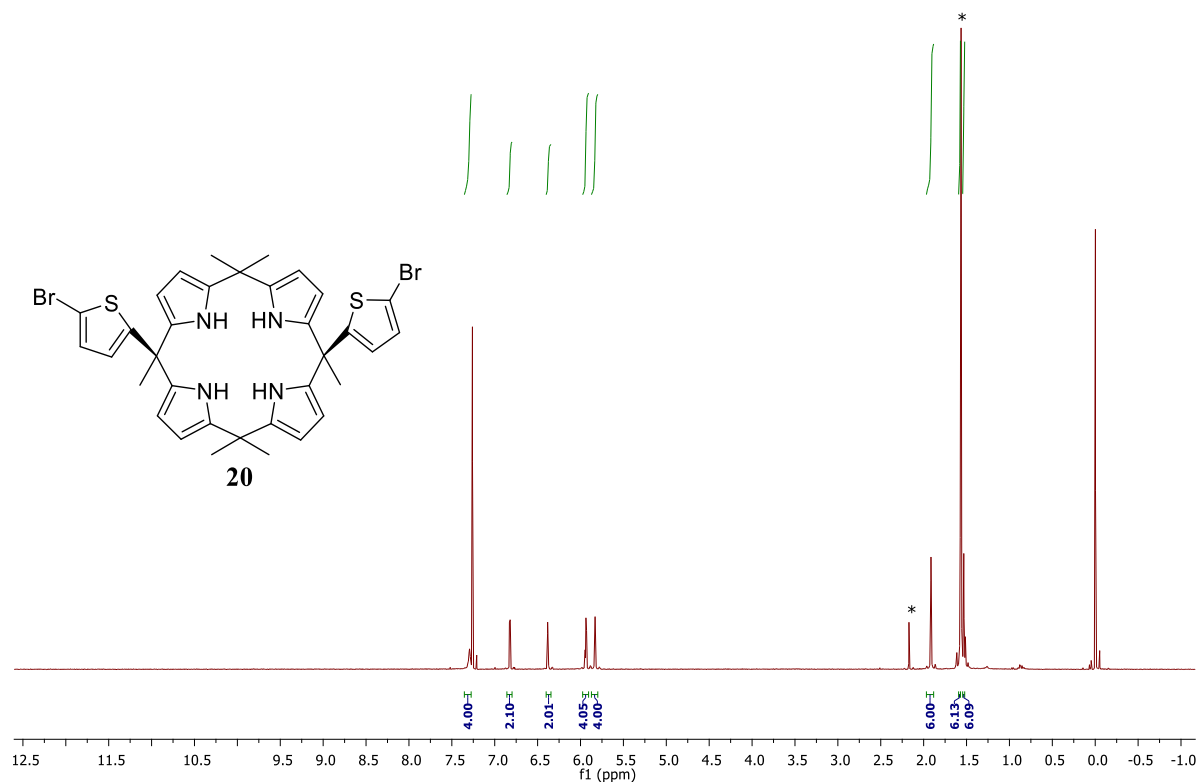

**Fig. S26.**  $^1\text{H-NMR}$  spectrum of compound **20** recorded in  $\text{CDCl}_3$  (\*Represents peaks due to residual solvents water and acetone)

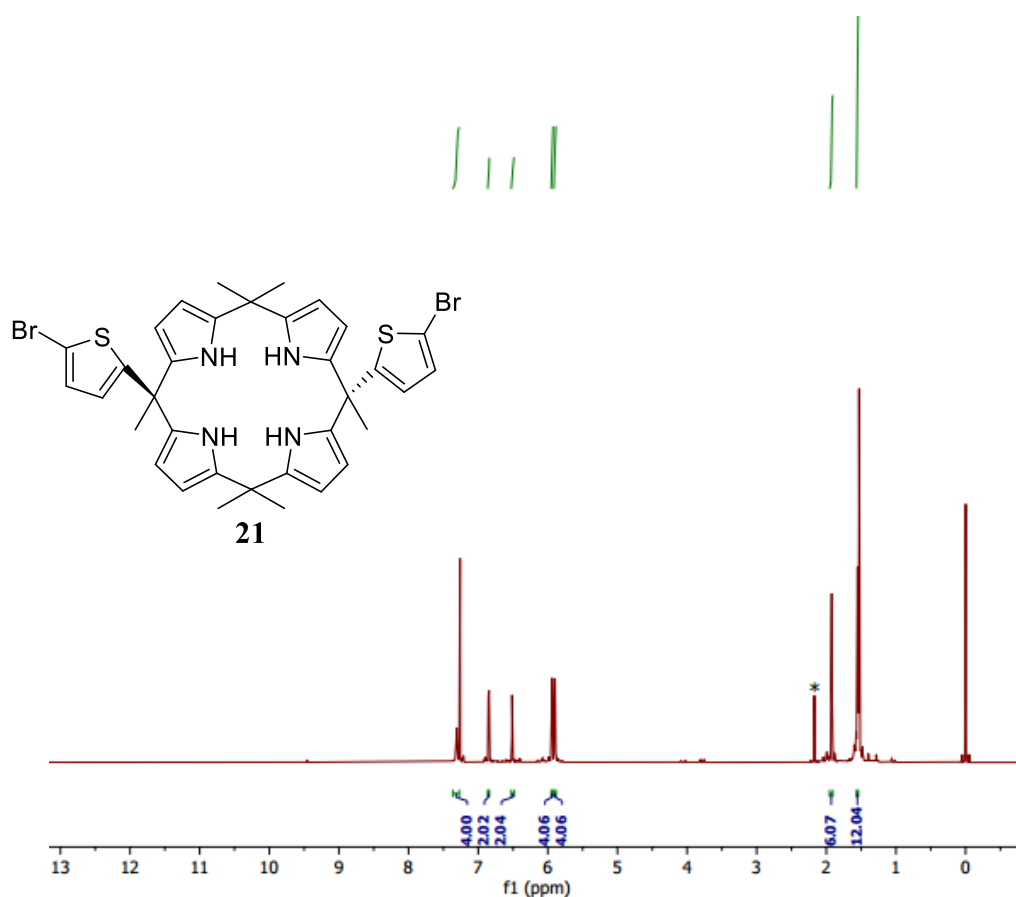

**Fig. S27.** <sup>1</sup>H-NMR spectrum of compound **21** recorded in CDCl<sub>3</sub>. (\*Represents a peak due to residual solvent acetone)

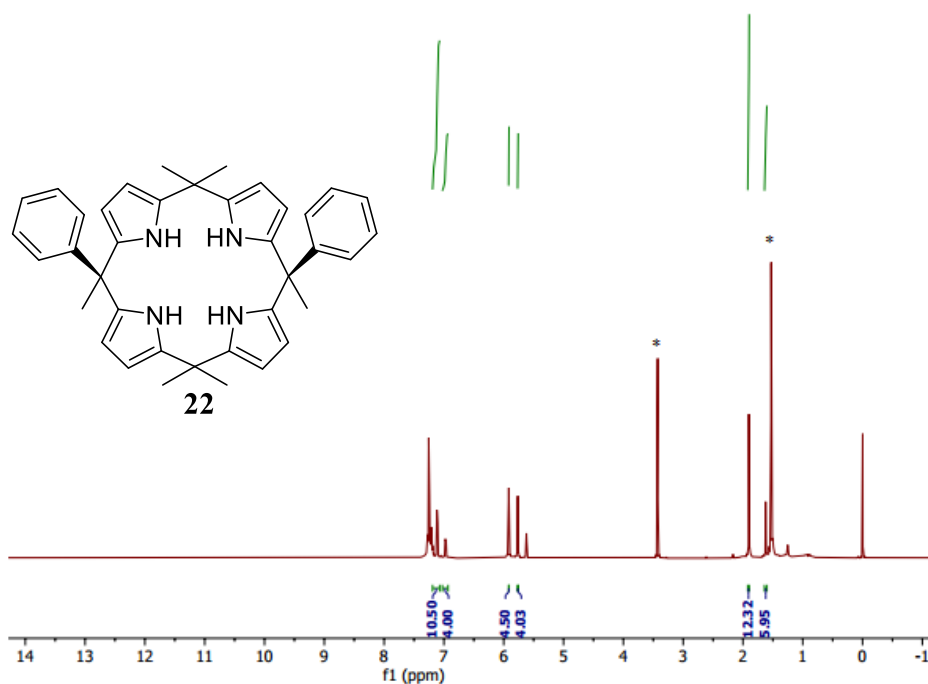

**Fig. S28.** <sup>1</sup>H-NMR spectrum of compound **22** recorded in CDCl<sub>3</sub>. (\*Represents peaks due to residual solvents water and methanol)



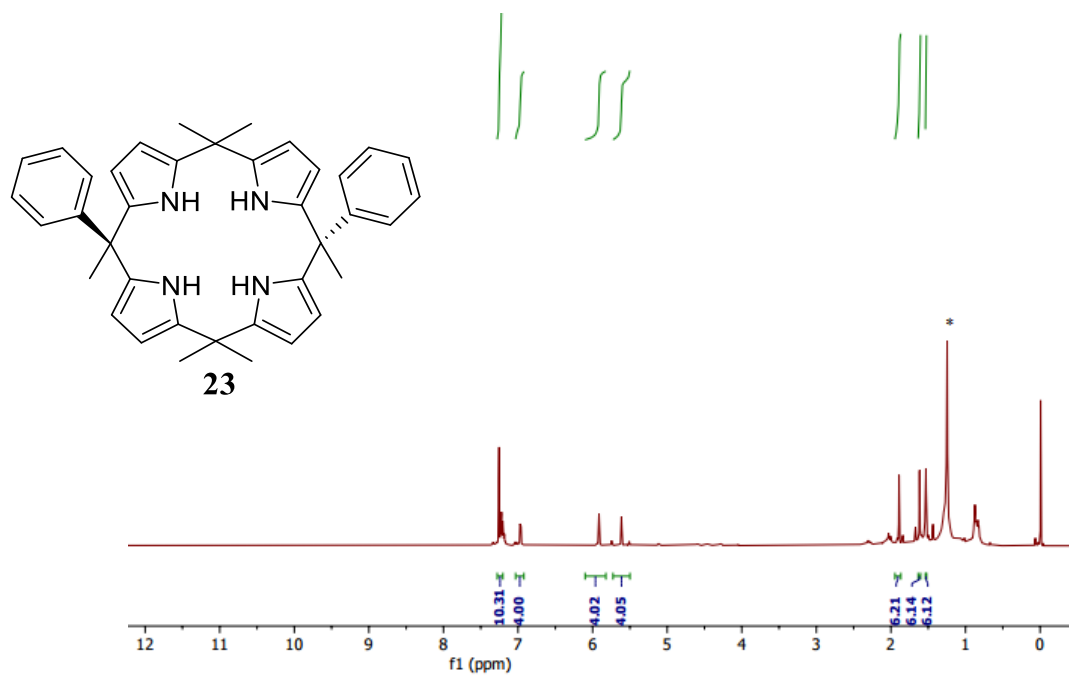

**Fig. S29.** <sup>1</sup>H-NMR spectrum of compound **23** recorded in CDCl<sub>3</sub>. (\*Represents a peak due to residual solvent ethanol)

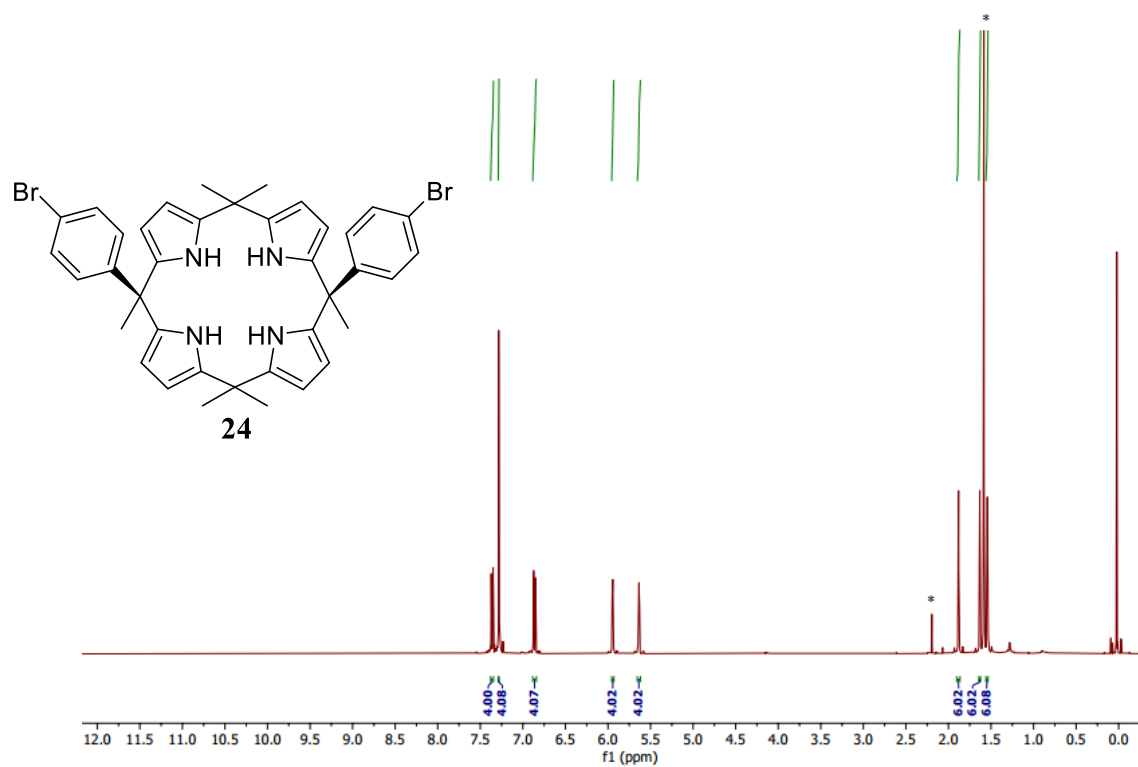

**Fig. S30.** <sup>1</sup>H-NMR spectrum of compound **24** recorded in CDCl<sub>3</sub>. (\*Represents peaks due to residual solvents water and acetone)

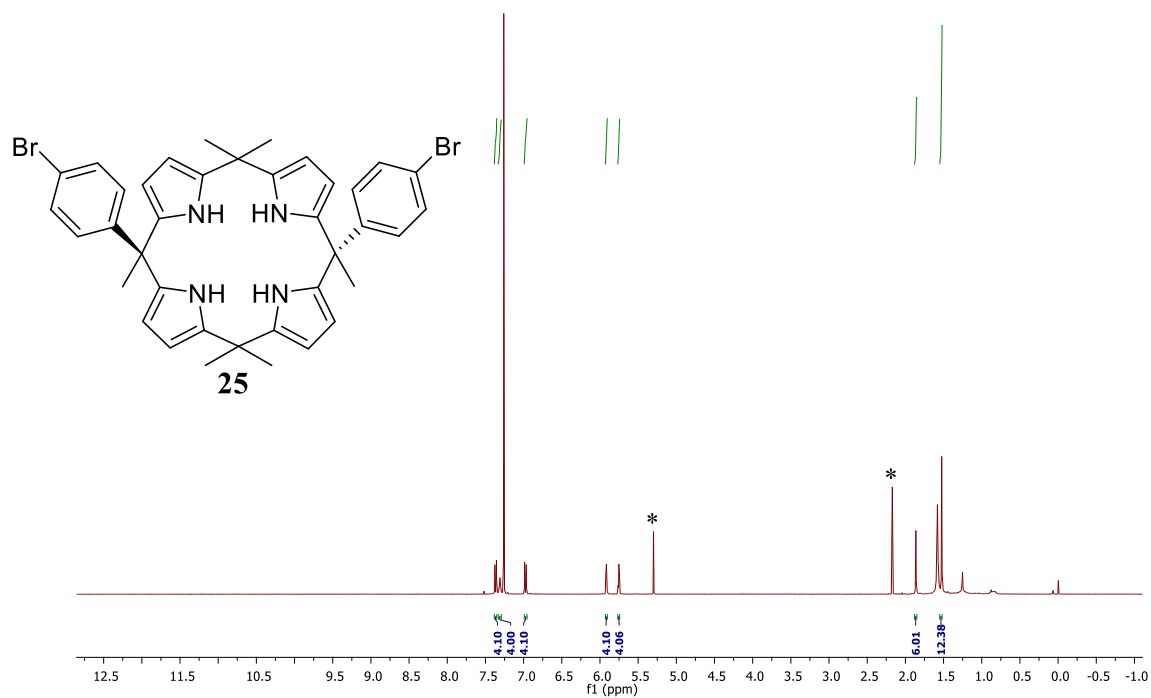

**Fig. S31.** <sup>1</sup>H-NMR spectrum of compound **25** recorded in CDCl<sub>3</sub>. (\*Represents peaks due to residual solvents acetone and dichloromethane)

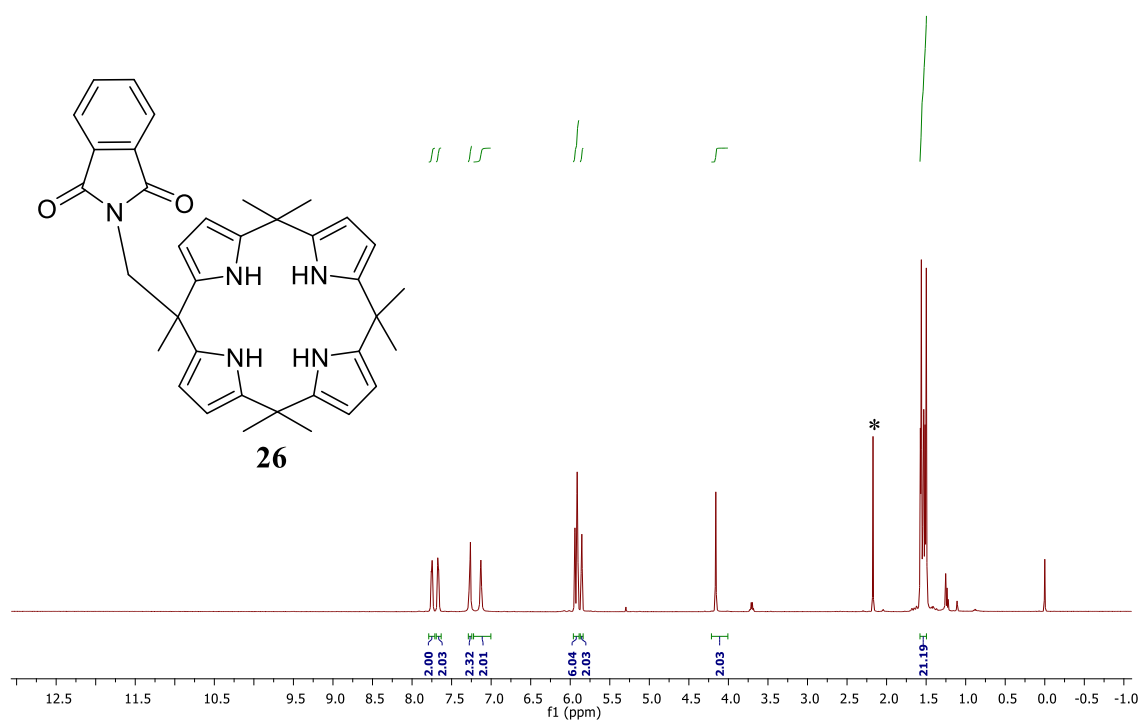

**Fig. S32.** <sup>1</sup>H-NMR spectrum of compound **26** recorded in CDCl<sub>3</sub>. (\*Represents a peak due to residual solvent acetone)

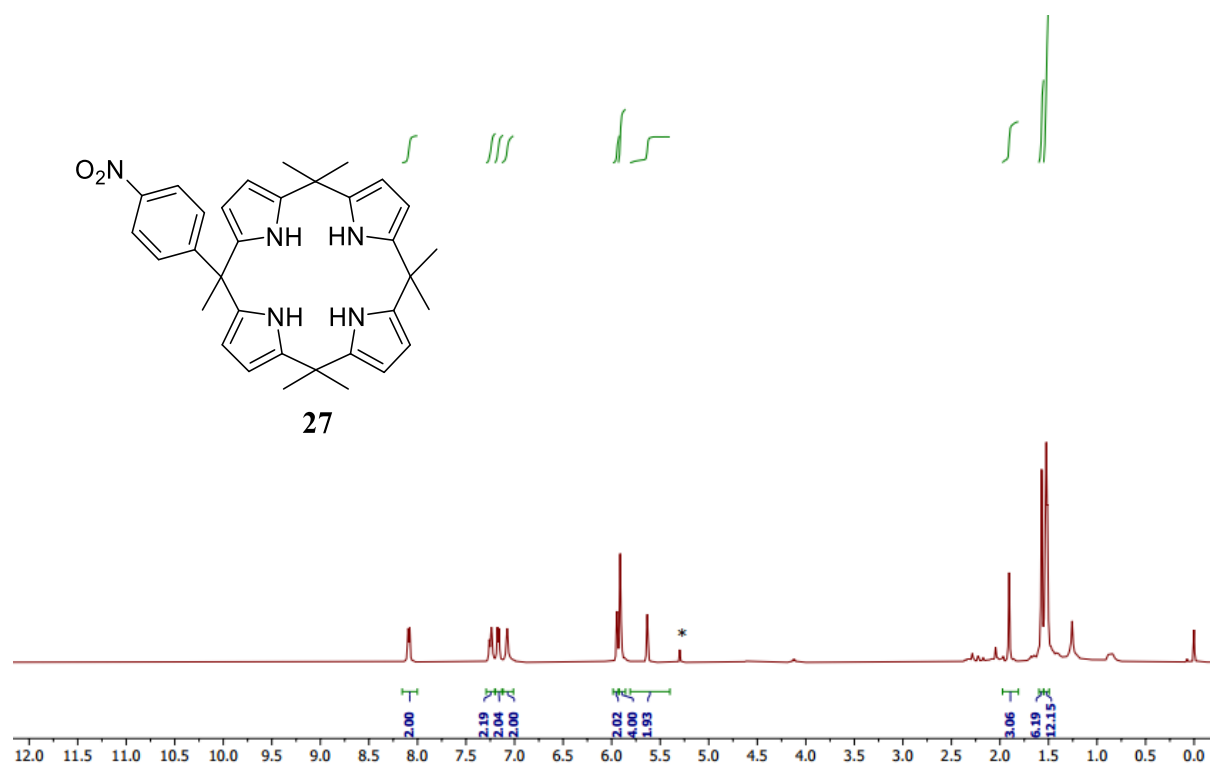

**Fig. S33.**  $^1\text{H-NMR}$  spectrum of compound **27** recorded in  $\text{CDCl}_3$ . (\*Represents a peak due to residual solvent dichloromethane)
